# Supplementary material for: Aly and THO are required for assembly of the human TREX complex and association of TREX components with the spliced mRNA
Source: PubMed Central journal article supplement — Nucleic Acids Res. 2012 Dec 7;41(2):1294–306. doi: 10.1093/nar/gks1188 (PMC3553972; doi:10.1093/nar/gks1188), 2012-12-07
Supplement: supp_gks1188_nar-02559-a-2012-File009.pdf [file supp_gks1188_nar-02559-a-2012-File009.pdf]

**Supplementary Table S1. Targeting sequences of shRNAs used in this study.**

| target gene             | sequence (5'-3')       |
|-------------------------|------------------------|
| Thoc2                   | NN-GGTTATGCCAAGCTGATTG |
| Thoc1                   | GGGAGTAACTGAAGGTATT    |
| Thoc5                   | CCAAATGTTTGGAGTTTAA    |
| Aly                     | TGGGAAACTGCTGGTGTCCAA  |
| Tex1                    | GTAAGAACCCTCAGTTTCA    |
| Thoc6                   | GCCAAAGAGGAAAGTAAGA    |
| Thoc7                   | GGAGATGATCGGAGAATTA    |
| negative control (Cntl) | AACAGTCGCGTTTGCTACTTT  |

**Supplementary Figures**

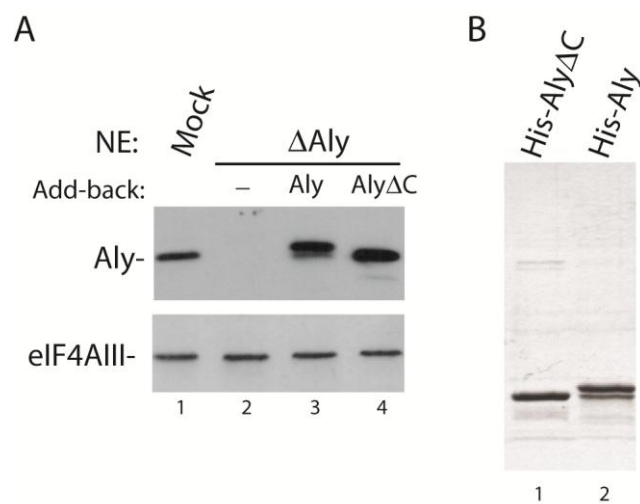

Figure S1

**Supplementary Figure S1. The amount of proteins added back to  $\Delta$ Aly extract were equal.** Left panel, equal amount of Mock nuclear extract and  $\Delta$ Aly nuclear

extract with or without supplementation of His-Aly or His-Aly $\Delta$ C were loaded followed by Western using Aly antibody. eIF4A3 served as a loading control. Right panel, equal amount of His-Aly and His-Aly $\Delta$ C were separated by SDS-PAGE and stained with coomassie blue.

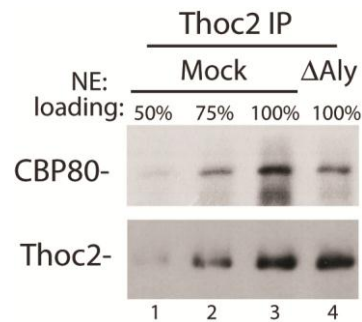

Figure S2

**Supplementary Figure S2. The Thoc2-CBP80 interaction mostly remains in the absence of Aly.** IPs from Mock and  $\Delta$ Aly extracts with the Thoc2 antibody were carried out. 50%, 75% and 100% of Thoc2 immunoprecipitate in Mock extract and 100% of that in  $\Delta$ Aly extract were loaded on the gel for comparison. Western analyses were carried out using CBP80 and Thoc2 antibodies.

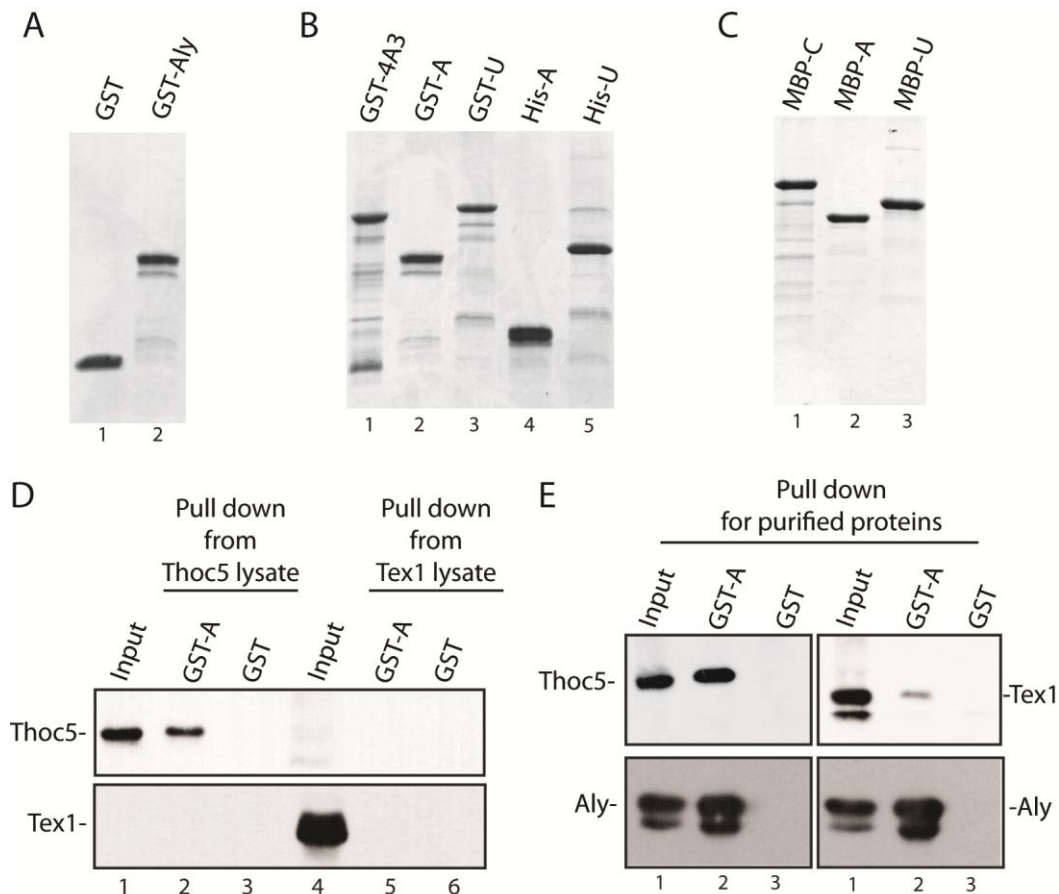

Figure S3

**Supplementary Figure S3. Interactions of Aly and UAP56 with THO subunit.** (A)

Equal amount of GST and GST-Aly were separated on a SDS-PAGE gel and stained

with coomassie blue. (B) Equal amount of GST-4A3, GST-Aly, GST-UAP56,

His-Aly and His-UAP56 were separated on a SDS-PAGE gel followed by coomassie

staining. (C) Equal amount of MBP tagged Mtr4N (MBP-C), Aly (MBP-A) and

UAP56 (MBP-U) were separated by SDS-PAGE and stained with coomassie blue. (D)

GST pull downs were carried out from insect lysates containing overexpressed Thoc5

or Tex1 using GST-Aly or GST protein followed by western analysis with the Thoc5

and Tex1 antibodies. (E) GST-Aly or GST was used for pull-down of purified Thoc5

and Tex1 followed by western analysis using the Thoc5 and Tex1 antibodies. Aly

served as loading control.

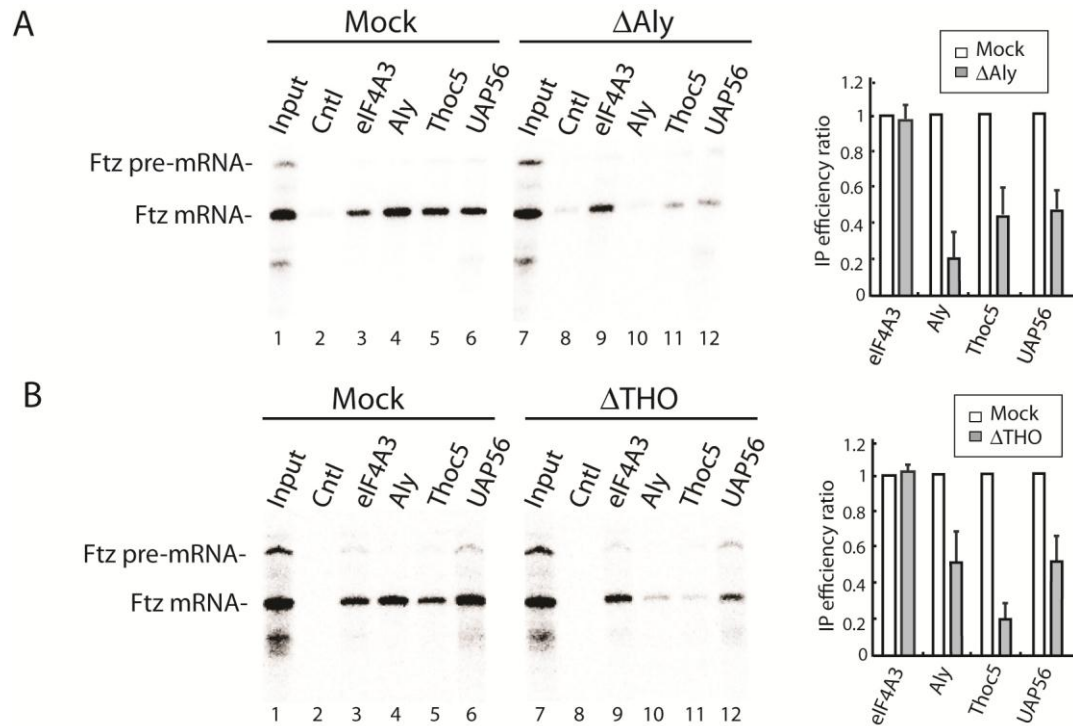

Figure S4

**Supplementary Figure S4. Aly and THO are both required for association of TREX components with Ftz spliced mRNA.** (A) Ftz pre-mRNA was incubated in Mock or  $\Delta$ Aly nuclear extract under splicing condition followed by mRNA-IPs using indicated antibodies. 25% of the input was loaded. Quantifications of three independent experiments are shown in the right panel. The bars indicate the ratio of IP efficiency in  $\Delta$ Aly extract relative to the corresponding IP efficiency in Mock extract. Error bars represent standard deviations (n=3). (B) Same as (A), except that  $\Delta$ THO nuclear extract was used instead of  $\Delta$ Aly nuclear extract.

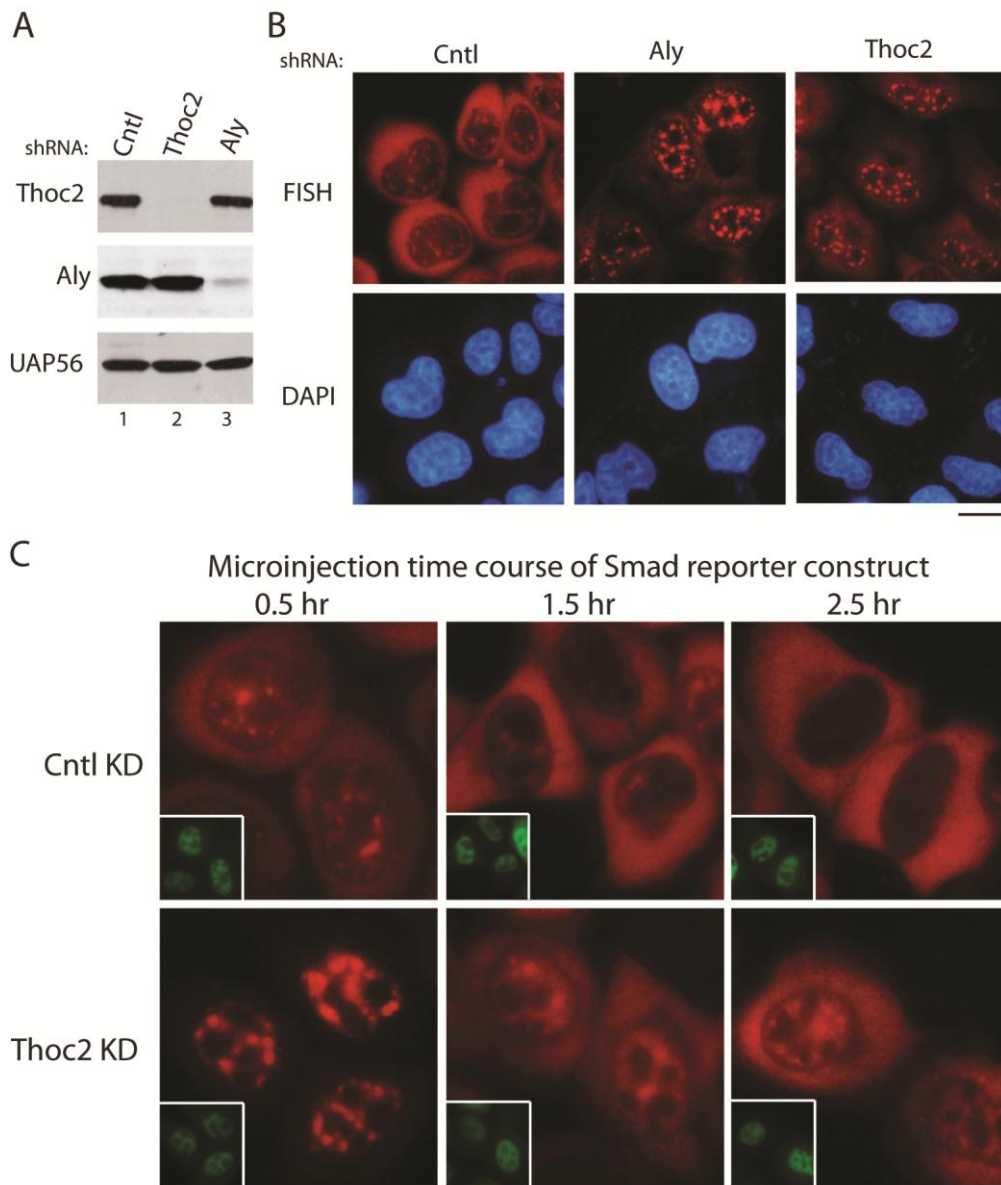

Figure S5

**Supplementary Figure S5. The role of THO in mRNA export.** (A) Western analysis of whole cell lysates of control, Thoc2 and Aly knockdown cells with indicated antibodies. UAP56 served as a loading control. (B) FISH for polyA<sup>+</sup> RNA were carried out for control, Aly and Thoc2 knockdown cells. (C) Smad construct was microinjected into nuclei of control and Thoc2 knockdown cells, and  $\alpha$ -amanitin was added to stop transcription 15 min after injection. FISH of Smad transcripts was carried out at indicated times after addition of  $\alpha$ -amanitin. Insets show

FITC-conjugated dextran co-injected as an injection marker. Scale bar, 10  $\mu$ m.

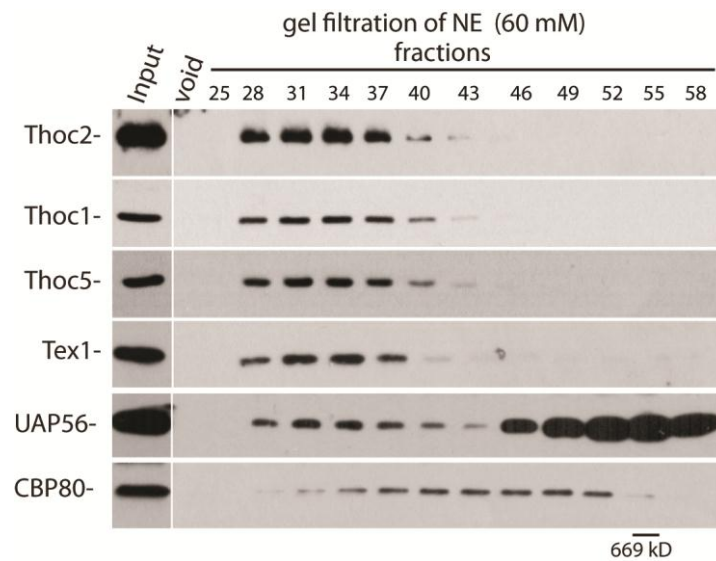

Figure S6

**Supplementary Figure S6. Only a small portion of UAP56 co-migrates with THO under low salt condition.** HeLa nuclear extracts were separated on a gel filtration column under 60 mM salt concentration followed by western analysis of the fractions using indicated antibodies.

### Supplementary methods

#### DNA microinjection and detection

HeLa cells used for microinjection were plated on coverslip bottom of 35 mm dishes coated with fibronectin. The CMV-Smad construct used for microinjection was described previously (35). Plasmid DNA (50 ng/ $\mu$ l) was coinjected with FITC-conjugated 70-kDa dextran, followed by incubation at 37  $^{\circ}$ C for 15 min. For each experiment, 50-70 cells were microinjected. Transcription was then terminated

by adding  $\alpha$ -amanitin (1  $\mu$ g/ml, Sigma), and incubation was continued for indicated times. A 70 nt FISH probe was labeled at the 5' end with Alexa Fluor 546 NHS Ester and HPLC purified. FISH was performed as described (35).

### **Supplementary reference**

35. Valencia, P., Dias, A.P. and Reed, R. (2008) Splicing promotes rapid and efficient mRNA export in mammalian cells. *Proc Natl Acad Sci U S A*, 105, 3386-3391.
